# Supplementary material for: Comparative electromagnetic shielding performance of Ti 3 C 2 T x -PVA composites in various structural forms: compact films, hydrogels, and aerogels
Source: Royal Society of Chemistry journal article supplement (doi:10.1039/d5nr00450k), 2025-01-01
Supplement: d5nr00450k1.pdf [file d5nr00450k1.pdf]

## Supporting Information

### **Comparative Electromagnetic Shielding Performance of $Ti_3C_2T_x$ -PVA Composites in Various Structural Forms: Compact Films, Hydrogels, and Aerogels**

Shabbir Madad Naqvi<sup>1</sup>, Tufail Hassan<sup>1</sup>, Aamir Iqbal<sup>1</sup>, Shakir Zaman<sup>1</sup>, Sooyeong Cho<sup>1</sup>, Noushad Hussain<sup>1</sup>, Xiangmeng Kong<sup>1</sup>, Zubair Khalid<sup>1</sup>, Zhiwang Hao<sup>1</sup>, Chong Min Koo<sup>1,2,\*</sup>

<sup>a</sup>School of Advanced Materials Science and Engineering, Sungkyunkwan University, Seobu-ro 2066, Jangan-gu, Suwon-si, Gyeonggi-do, 16419 Republic of Korea.

<sup>b</sup>School of Chemical Engineering, Sungkyunkwan University, Seobu-ro 2066, Jangan-gu, Suwon-si, Gyeonggi-do, 16419 Republic of Korea.

\*Corresponding author. Email: [chongminkoo@skku.edu](mailto:chongminkoo@skku.edu) (C. M. K.)

#### **Contents:**

Figure S1 to S11

Table S1

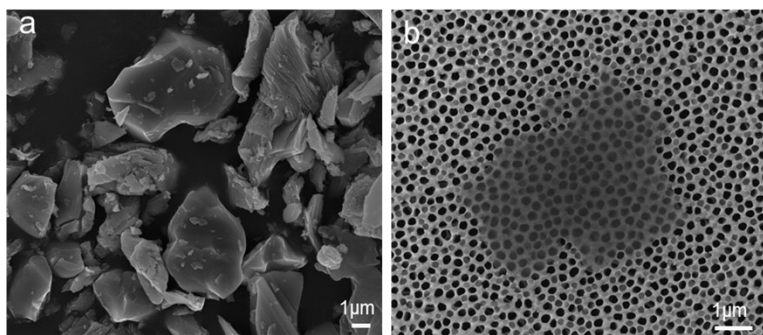

**Figure S1.** SEM images of (a)  $\text{Ti}_3\text{AlC}_2$  MAX powders and (b) a single  $\text{Ti}_3\text{C}_2\text{T}_x$  flake.

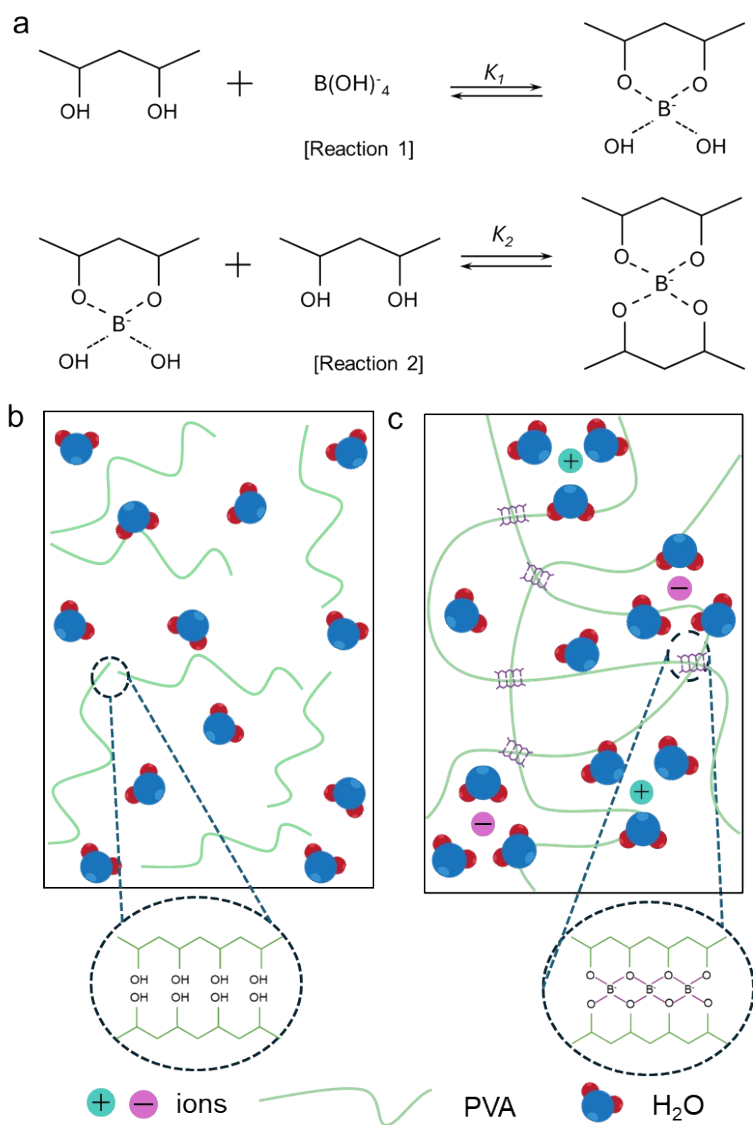

**Figure S2.** (a) PVA-borate crosslinking mechanism: reaction 1, monodiol complexation; and reaction 2, crosslink formation. Schematic illustration of bonding interactions (b) before and (c) after adding borax to a PVA aqueous solution.

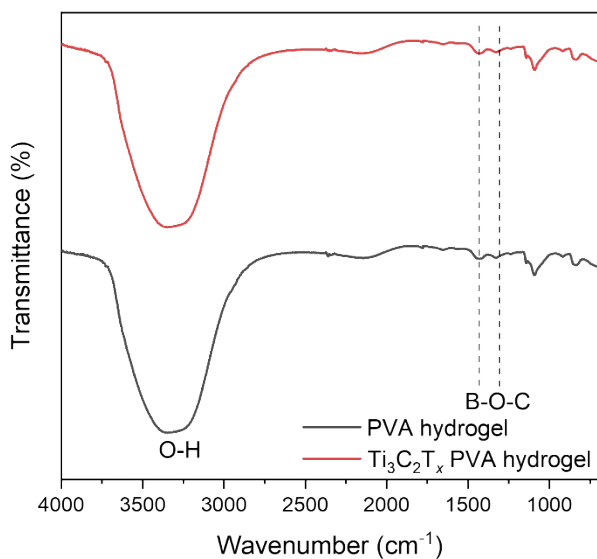

**Figure S3.** Fourier Transform Infrared spectroscopy spectra of PVA hydrogel, and  $\text{Ti}_3\text{C}_2\text{T}_x$ -PVA hydrogel.

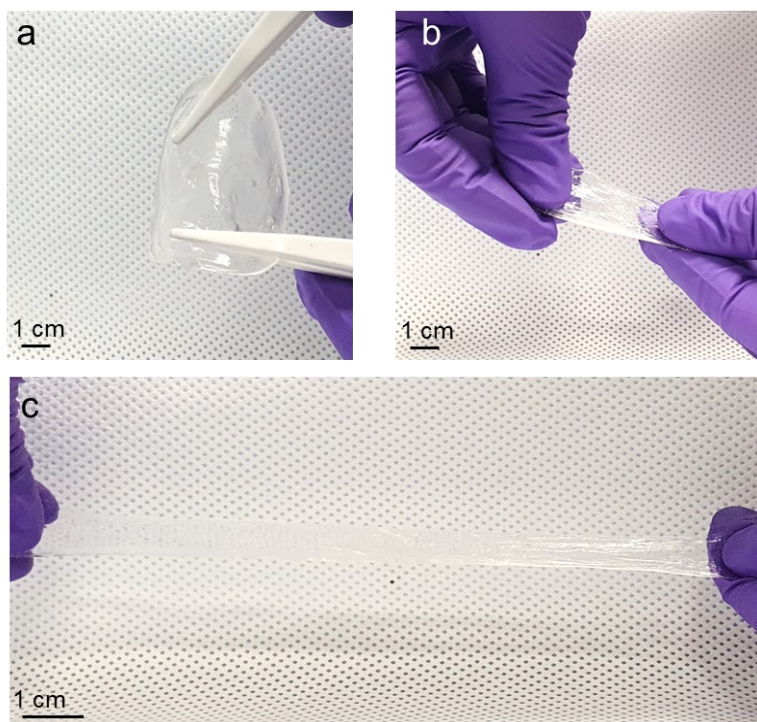

**Figure S4.** (a–c) Digital photographs of a PVA gel and its stretchable behavior.

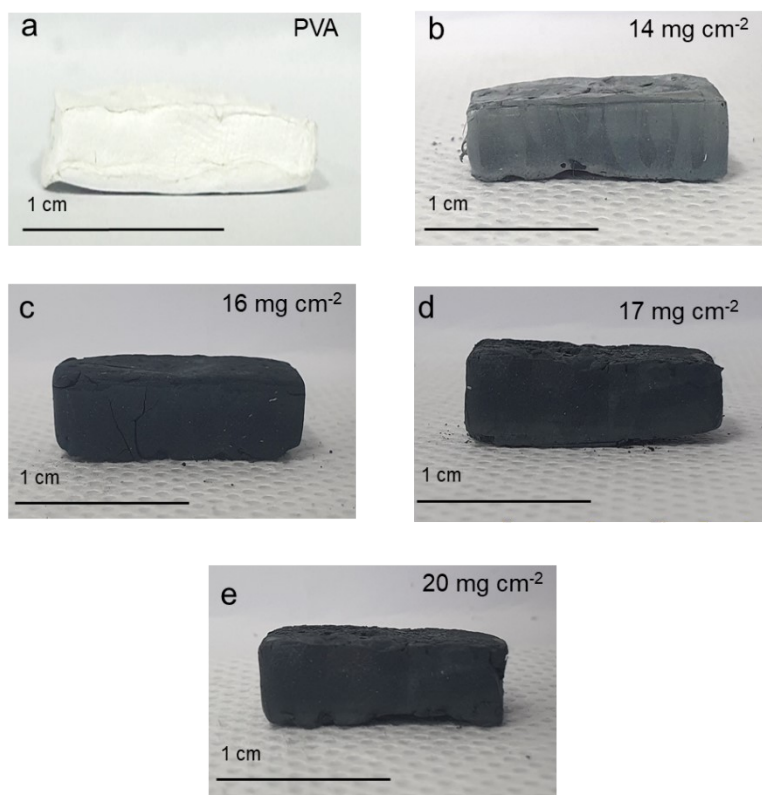

**Figure S5.** Digital photographs of  $\text{Ti}_3\text{C}_2\text{T}_x$ -PVA aerogels at various  $\text{Ti}_3\text{C}_2\text{T}_x$  areal densities.

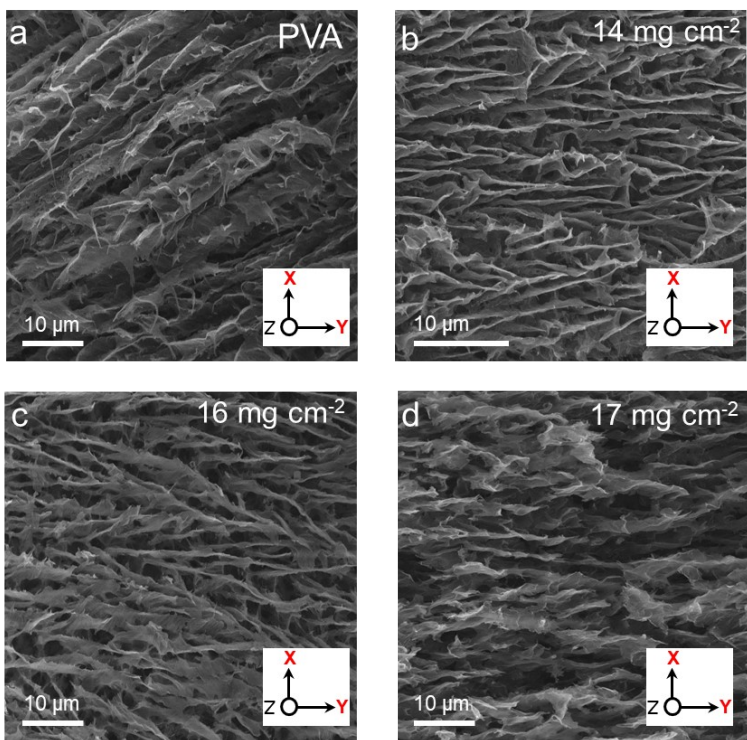

**Figure S6.** Cross-sectional SEM images in the XY direction of (a) PVA and (b–d) Ti<sub>3</sub>C<sub>2</sub>T<sub>x</sub>-PVA aerogels at various Ti<sub>3</sub>C<sub>2</sub>T<sub>x</sub> areal densities.

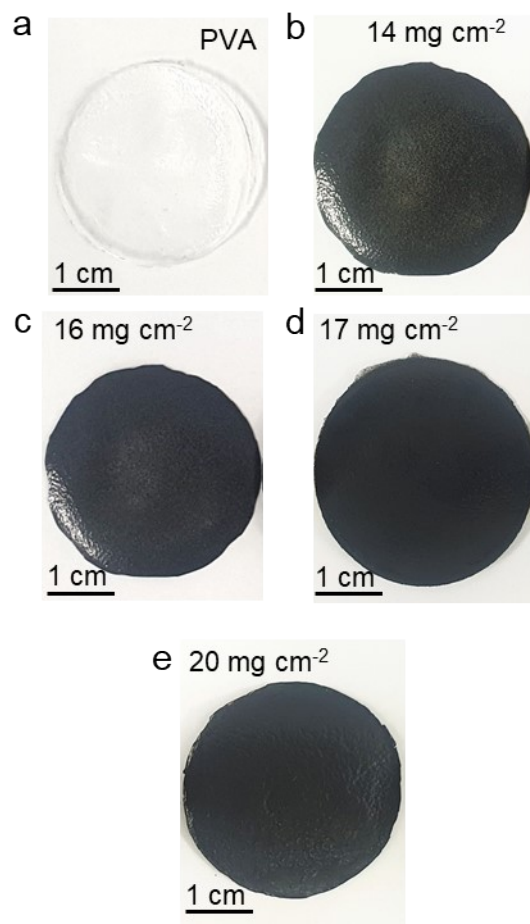

**Figure S7.** Digital photographs of (a) PVA and (b–e)  $\text{Ti}_3\text{C}_2\text{T}_x$ -PVA compact films at various  $\text{Ti}_3\text{C}_2\text{T}_x$  areal densities.

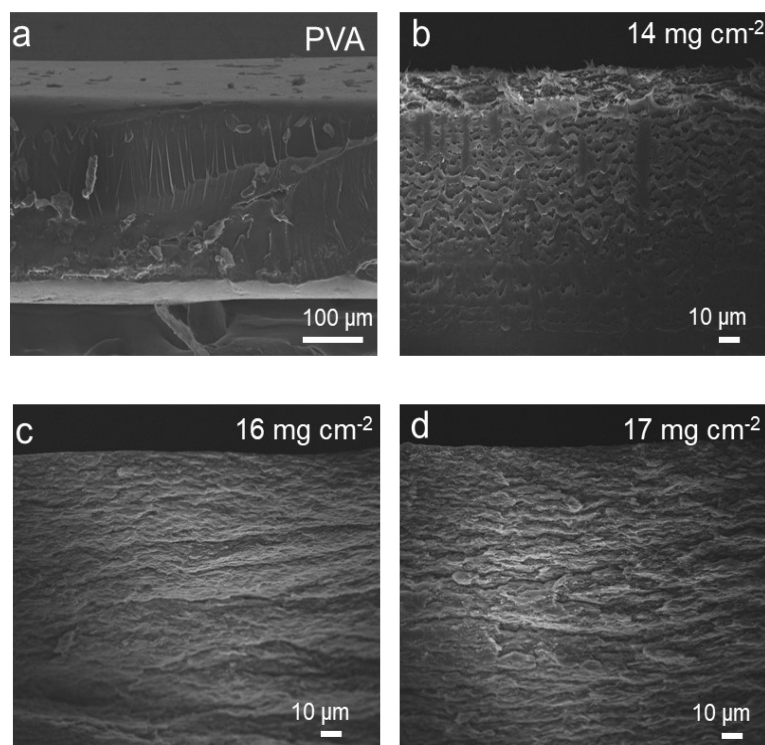

**Figure S8.** SEM images of (a) PVA and (b–d) Ti<sub>3</sub>C<sub>2</sub>T<sub>x</sub>-PVA compact films at various Ti<sub>3</sub>C<sub>2</sub>T<sub>x</sub> areal densities.

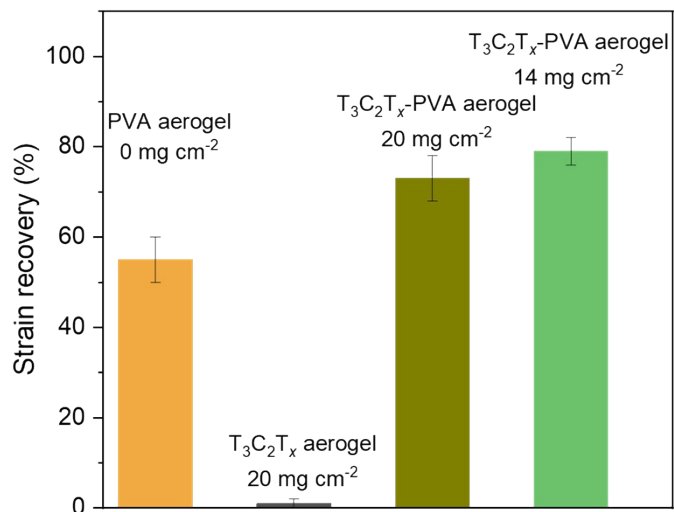

**Figure S9.** Strain recovery percentage of aerogels after applied compressive load is released.



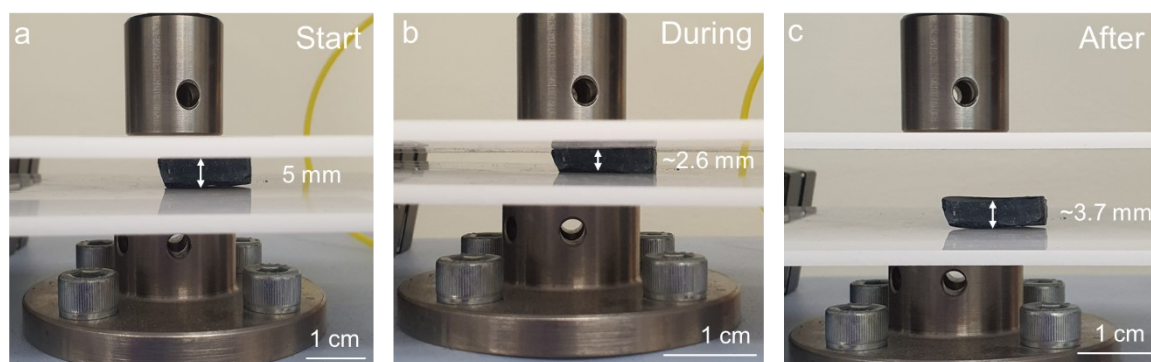

**Figure S10.** Digital photographs of the  $\text{Ti}_3\text{C}_2\text{T}_x$ -PVA aerogel ( $20 \text{ mg cm}^{-2}$ ) taken at the start (a), during the application of compressive stress (b), and after the removal of compressive stress (c).

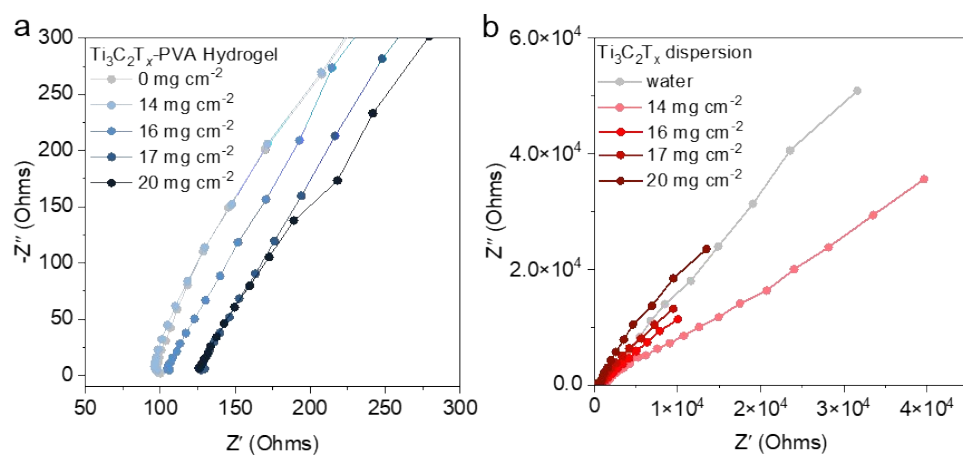

**Figure S11.** Nyquist plots for (a)  $\text{Ti}_3\text{C}_2\text{T}_x$ -PVA hydrogel and (b)  $\text{Ti}_3\text{C}_2\text{T}_x$  dispersion in deionized water at various  $\text{Ti}_3\text{C}_2\text{T}_x$  areal densities.

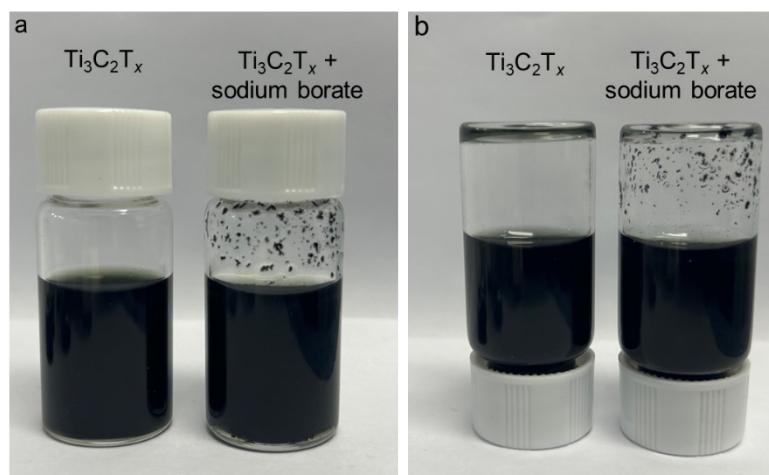

**Figure S12.** (a–b) Digital photographs of  $Ti_3C_2T_x$  aqueous dispersions with and without sodium borate to highlight the coagulation behavior of the dispersion after the addition of sodium borate.

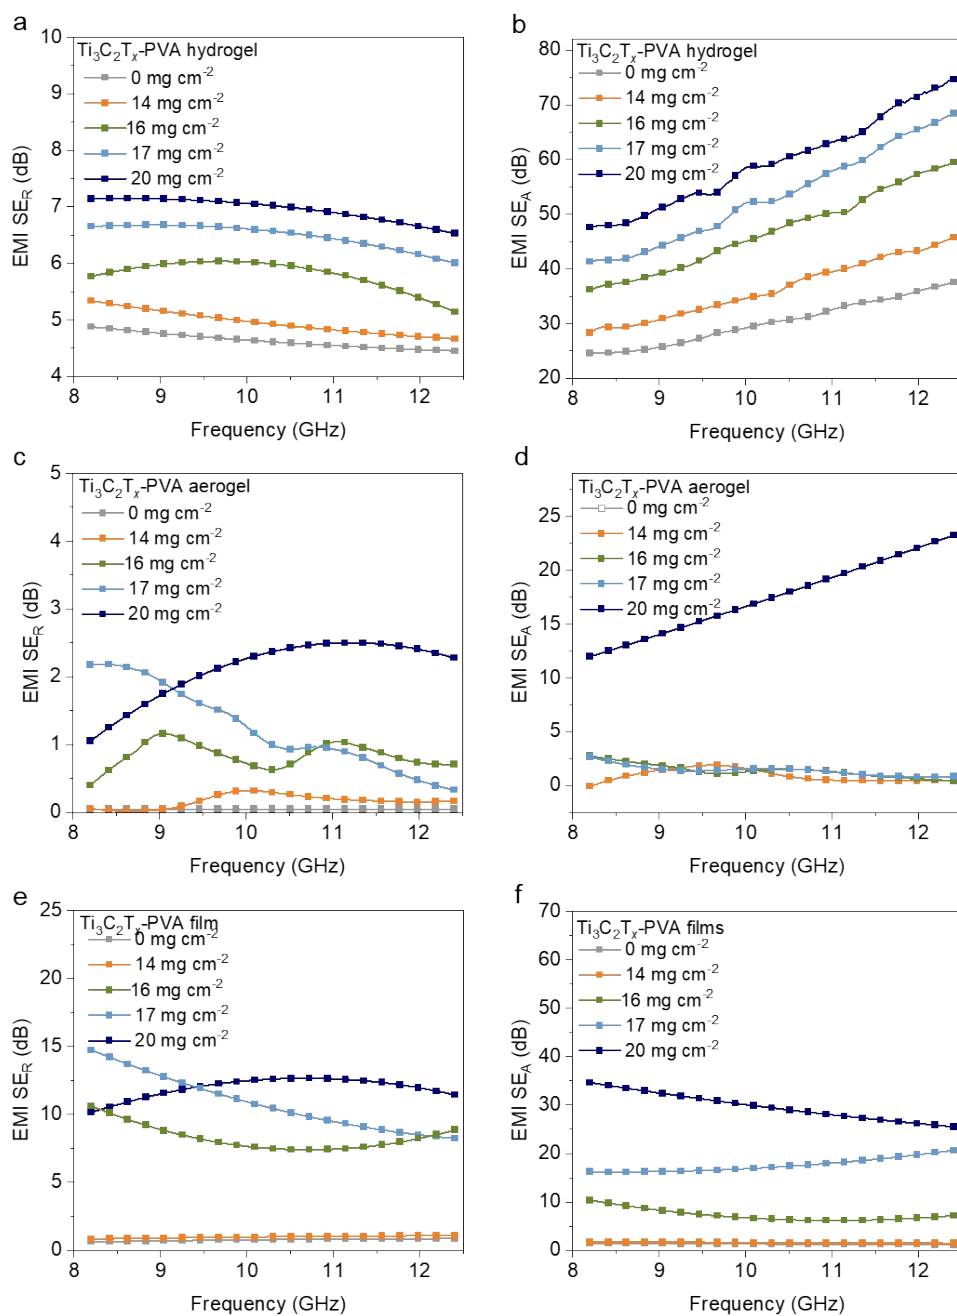

**Figure S13.** SE<sub>R</sub> and SE<sub>A</sub> for (a–b) Ti<sub>3</sub>C<sub>2</sub>T<sub>x</sub>-PVA hydrogels, (c–d) Ti<sub>3</sub>C<sub>2</sub>T<sub>x</sub>-PVA aerogels, and (e–f) Ti<sub>3</sub>C<sub>2</sub>T<sub>x</sub>-PVA compact films, respectively.

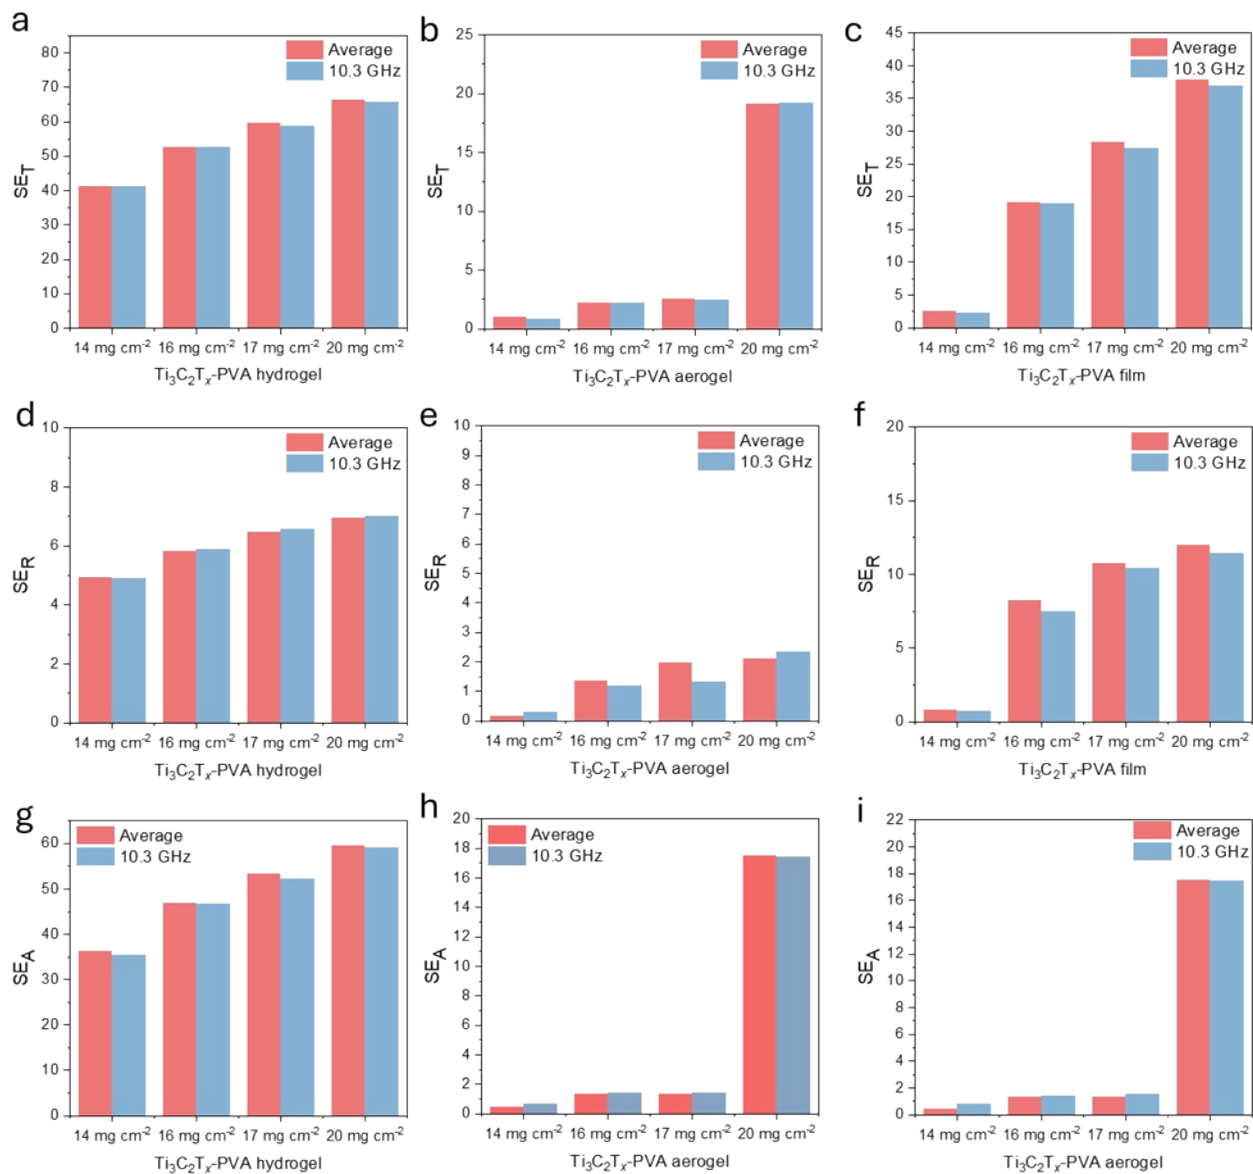

**Figure S14.** Comparison between average EMI shielding parameters and EMI shielding parameters from 10.3 GHz SE<sub>T</sub> (a-c), SE<sub>R</sub> (d-f) and SE<sub>A</sub> (g-i).

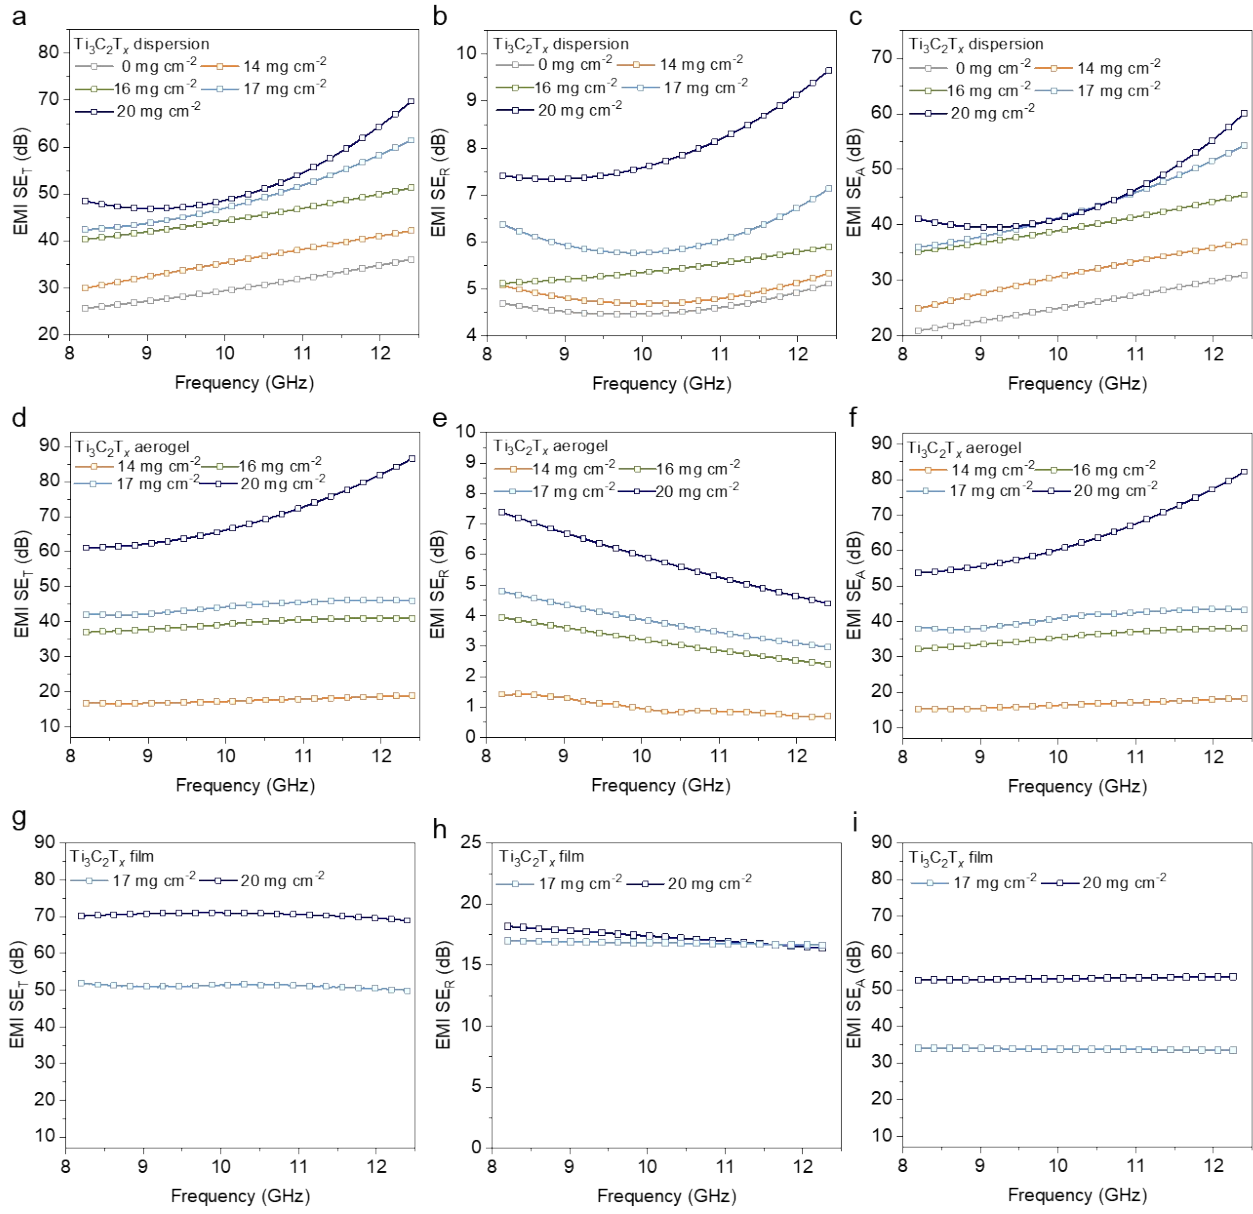

**Figure S15.**  $SE_T$ ,  $SE_R$ , and  $SE_A$  of (a–c)  $Ti_3C_2T_x$  dispersions, (d–f)  $Ti_3C_2T_x$  aerogels, and (g–i)  $Ti_3C_2T_x$  compact films, respectively.

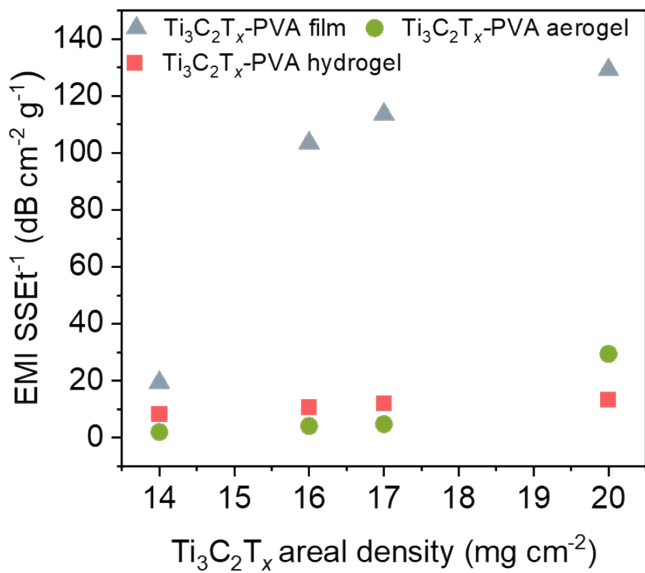

**Figure S16.** Absolute specific shielding efficiency of Ti<sub>3</sub>C<sub>2</sub>T<sub>x</sub>-PVA film, aerogel and hydrogel with respect to Ti<sub>3</sub>C<sub>2</sub>T<sub>x</sub> areal density.

**Table S1.** Thickness, density, tensile strength, elongation at break, Young's modulus and ionic/electrical conductivity for Ti<sub>3</sub>C<sub>2</sub>T<sub>x</sub>-PVA hydrogels, aerogels, and compact films.

| Sample                                                                                | Thickness (mm)          | $\rho$ (g cm <sup>-3</sup> ) | Tensile/compressive strength (MPa) | Elongation at break (%) | Young's modulus (GPa)   | Ionic conductivity/electrical conductivity (S cm <sup>-1</sup> ) |
|---------------------------------------------------------------------------------------|-------------------------|------------------------------|------------------------------------|-------------------------|-------------------------|------------------------------------------------------------------|
| <b>Hydrogels</b>                                                                      |                         |                              |                                    |                         |                         |                                                                  |
| PVA hydrogel                                                                          | 5±0.02                  | 0.99±0.01                    | 2.48±0.01                          | 417.29±2                | 3.51 x 10 <sup>-3</sup> | 4.98 x 10 <sup>-4*</sup>                                         |
| Ti <sub>3</sub> C <sub>2</sub> T <sub>x</sub> -PVA hydrogel (14 mg cm <sup>-2</sup> ) | 5±0.02                  | 1.01±0.01                    | 4.83±0.02                          | 636.45±2                | 6.62 x 10 <sup>-3</sup> | 5.08 x 10 <sup>-4*</sup>                                         |
| Ti <sub>3</sub> C <sub>2</sub> T <sub>x</sub> -PVA hydrogel (20 mg cm <sup>-2</sup> ) | 5±0.02                  | 1.02±0.02                    | 3.44±0.01                          | 507.81±1                | 5.91 x 10 <sup>-3</sup> | 3.89 x 10 <sup>-4*</sup>                                         |
| Ti <sub>3</sub> C <sub>2</sub> T <sub>x</sub> dispersion (20 mg cm <sup>-2</sup> )    | 5±0.02                  | 1.03±0.01                    | -                                  | -                       | -                       | 2.35 x 10 <sup>-4*</sup>                                         |
| <b>Aerogels</b>                                                                       |                         |                              |                                    |                         |                         |                                                                  |
| PVA-aerogel                                                                           | 5±0.02                  | 0.10±0.01                    | 129.21 x 10 <sup>-3</sup>          | 50.01±0.01              | 1.13 x 10 <sup>-7</sup> | ~1 x 10 <sup>-13</sup>                                           |
| Ti <sub>3</sub> C <sub>2</sub> T <sub>x</sub> -PVA aerogel (14 mg cm <sup>-2</sup> )  | 5±0.01                  | 0.11±0.01                    | 215.32 x 10 <sup>-3</sup>          | 50.01±0.01              | 6.3 x 10 <sup>-5</sup>  | 2.62 x 10 <sup>-8</sup>                                          |
| Ti <sub>3</sub> C <sub>2</sub> T <sub>x</sub> -PVA aerogel (20 mg cm <sup>-2</sup> )  | 5±0.01                  | 0.14±0.01                    | 113.17 x 10 <sup>-3</sup>          | 50.01±0.01              | 2.4 x 10 <sup>-5</sup>  | 1.98 x 10 <sup>-3</sup>                                          |
| Ti <sub>3</sub> C <sub>2</sub> T <sub>x</sub> aerogel (20 mg cm <sup>-2</sup> )       | 5±0.01                  | 0.04±0.01                    | 1.06 x 10 <sup>-3</sup>            | 50.00±0.01              | 6.0 x 10 <sup>-8</sup>  | 1.1                                                              |
| <b>Compact films</b>                                                                  |                         |                              |                                    |                         |                         |                                                                  |
| PVA-film                                                                              | 9.5 x 10 <sup>-2</sup>  | 1.16±0.02                    | 32.53±0.2                          | 107.52±0.02             | 1.6±0.01                | ~1.1 x 10 <sup>-12</sup>                                         |
| Ti <sub>3</sub> C <sub>2</sub> T <sub>x</sub> -PVA film (14 mg cm <sup>-2</sup> )     | 11.5 x 10 <sup>-2</sup> | 1.17±0.02                    | 55.04±0.3                          | 65.5±0.05               | 2.1±0.02                | 9.20 x 10 <sup>-8</sup>                                          |
| Ti <sub>3</sub> C <sub>2</sub> T <sub>x</sub> -PVA film (20 mg cm <sup>-2</sup> )     | 18.1 x 10 <sup>-2</sup> | 1.62±0.02                    | 31.89±0.2                          | 13.96±0.04              | 6.1±0.03                | 3.42 x 10 <sup>-2</sup>                                          |
| Ti <sub>3</sub> C <sub>2</sub> T <sub>x</sub> film (20 mg cm <sup>-2</sup> )          | 9 x 10 <sup>-3</sup>    | 3.83±0.01                    | 29.38±0.1                          | 0.37±0.001              | 9.2±0.01                | 10,000                                                           |

\*Ionic conductivity (S cm<sup>-1</sup>)
